# Supplementary material for: Fire Severity Filters Regeneration Traits to Shape Community Assembly in Alaska’s Boreal Forest
Source: PLoS One. 2013 Feb 13;8(2):e56033. doi: 10.1371/journal.pone.0056033 (PMC3572144; doi:10.1371/journal.pone.0056033)
Supplement: Table S2 — Complete vascular and nonvascular species list across all study sites. Vascular species were verified in the University of Alaska herbarium and nonvascular species were verified from voucher species in the BNZ LTER working herbarium. (XLSX) [file pone.0056033.s002.xlsx]

## Sheet: S2
Type	Family	Genus	Species
club moss	Lycopodiaceae	Lycopodium	annotinum
club moss	Lycopodiaceae	Lycopodium	clavatum
club moss	Lycopodiaceae	Diphasiastrum	complanatum
forb	Asteraceae	Achillea	millefolium
forb	Asteraceae	Aster	sp.
forb	Asteraceae	Saussurea	angustifolia
forb	Boraginaceae	Mertensia	paniculata
forb	Boraginaceae	Scutellaria	galericulata
forb	Caryophyllaceae	Stellaria	calycantha
forb	Caryophyllaceae	Stellaria	longipes
forb	Chenopodiaceae	Chenopodium	capitatum
forb	Compositae	Crepis	tectorum
forb	Compositae	Erigeron	acris
forb	Compositae	Hieracuim	scabiuscula
forb	Compositae	Petasites	frigidus
forb	Compositae	Senecio	congestus
forb	Compositae	Taraxacum	officinale
forb	Cornaceae	Chamaepericlymenum	canadensis
forb	Cruciferae	Cardimine	digitata
forb	Cruciferae	Draba	sp.
forb	Droseracea	Drosera	rotundifolia
forb	Fumariaceae	Corydalis	sempervirens
forb	Iridaceae	Iris	setosa
forb	Leguminosae	Astragalus	bodinii
forb	Onagraceae	Chamerion	angustifolium
forb	Onagraceae	Epilobium	ciliatum
forb	Onagraceae	Epilobium	palustre
forb	Orchidaceae	Spiranthes	romanzoffiana
forb	Polemoniaceae	Polemonium	sp.
forb	Polygonaceae	Aconogonon	alaskanum
forb	Polygonaceae	Bistorta	elliptica
forb	Polygonaceae	Rumex	arcticus
forb	Pyrolaceae	Pyrola	asarifolia
forb	Pyrolaceae	Pyrola	grandiflora
forb	Pyrolaceae	Orthilia	secunda
forb	Ranunculaceae	Anemone	parviflora
forb	Ranunculaceae	Ranunculus	sp.
forb	Rosaceae	Lupinus	arcticus
forb	Rosaceae	Potentilla	palustris
forb	Rosaceae	Rubus	arcticus
forb	Rubiaceae	Galium	boreale
forb	Santalaceae	Geocaulon	lividum
forb	Saxifragaceae	Parnassia	palustris
forb	Saxifragaceae	Micranthes	hieracifolia
forb	Scrophulariaceae	Pedicularis	lapponica
forb	Valerianaceae	Valeriana	capitata
graminoid	Cyperaceae	Carex	aquatilis
graminoid	Cyperaceae	Carex	bigelowii
graminoid	Cyperaceae	Carex	canescens
graminoid	Cyperaceae	Carex	media
graminoid	Cyperaceae	Eriophorum	vaginatum
graminoid	Cyperaceae	Eriophorum	angustifolium
graminoid	Cyperaceae	Eriophorum	chamissonis
graminoid	Gramineae	Arctagrostis	latifolia
graminoid	Gramineae	Calamagrostis	canadensis
graminoid	Gramineae	Calamagrostis	lapponica
graminoid	Gramineae	Glyceria	sp.
graminoid	Gramineae	Hordium	jubatum
graminoid	Gramineae	Luzula	multiflora
graminoid	Gramineae	Luzula	rufescens
graminoid	Gramineae	Poa	palustris
graminoid	Gramineae	Poa	pratensis
graminoid	Gramineae	Poa	sp
horsetail	Equisetaceae	Equisetum	arvense
horsetail	Equisetaceae	Equisetum	pratense
horsetail	Equisetaceae	Equisetum	scirpoides
horsetail	Equisetaceae	Equisetum	sylvaticum
shrub	Betulaceae	Alnus	viridis
shrub	Betulaceae	Betula	glandulosa
shrub	Betulaceae	Betula	nana
shrub	Caprifoliaceae	Linnaea	borealis
shrub	Caprifoliaceae	Viburnum	edule
shrub	Elaeagnaceae	Shepherdia	canadensis
shrub	Empetraceae	Empetrum	nigrum
shrub	Ericaceae	Andromeda	polifolia
shrub	Ericaceae	Arctous	rubra
shrub	Ericaceae	Arctostaphylos	uva-ursi
shrub	Ericaceae	Chamaedaphne	calyculata
shrub	Ericaceae	Rhododendron	groenlandicum
shrub	Ericaceae	Oxycoccos	microcarpus
shrub	Ericaceae	Rhododendron	tomentosum
shrub	Ericaceae	Vaccinium	uliginosum
shrub	Ericaceae	Vaccinium	vitis-idaea
shrub	Rosaceae	Dasiphora	fruticosa
shrub	Rosaceae	Rosa	acicularis
shrub	Rosaceae	Rubus	chamaemorus
shrub	Rosaceae	Rubus	idaeus
shrub	Rosaceae	Spiraea	stevenii
shrub	Salicaceae	Salix	alaxensis
shrub	Salicaceae	Salix	arbusculoides
shrub	Salicaceae	Salix	bebbiana
shrub	Salicaceae	Salix	fuscescens
shrub	Salicaceae	Salix	glauca
shrub	Salicaceae	Salix	myrtillifolia
shrub	Salicaceae	Salix	pseudomyrsinites
shrub	Salicaceae	Salix	pulchra
shrub	Salicaceae	Salix	scouleriana
tree	Betulaceae	Betula	neoalaskana
tree	Pinaceae	Picea	glauca
tree	Pinaceae	Picea	mariana
tree	Salicaceae	Populus	balsamifera
tree	Salicaceae	Populus	tremuloides
lichen	Cladoniaceae	Cladina	arbuscula
lichen	Cladoniaceae	Cladina	rangifernia
lichen	Cladoniaceae	Cladonia	amaurocraea
lichen	Cladoniaceae	Cladonia	cornuta
lichen	Cladoniaceae	Cladonia	gracilis
lichen	Cladoniaceae	Cladonia	multiformis
lichen	Lobariaceae	Lobaria	linita
lichen	Nephromataceae	Nephroma	arcticum
lichen	Parmeliaceae	Cetraria	cucullata
lichen	Parmeliaceae	Cetraria	islandica
lichen	Peltigeraceae	Peltigera	aphthosa
lichen	Peltigeraceae	Peltigera	canina
lichen	Peltigeraceae	Peltigera	neopolydactyla
lichen	Peltigeraceae	Peltigera	scabrosa
lichen	Stereocaulaceae	Stereocaulon	alpinum
liverwart	Marchantiaceae	Marchantia	polymorpha
moss	Aulacomniaceae	Aulacomnium	palustre
moss	Aulacomniaceae	Aulacomnium	turgidum
moss	Dicranaceae	Dicranum	sp
moss	Ditrichaceae	Ceratodon	purpureus
moss	Entodontaceae	Pleurozium	schreberi
moss	Hylocomiaceae	Hylocomium	splendens
moss	Hypnaceae	Ptilium	crista-castrensis
moss	Hypnaceae	Tomentypnum	nitens
moss	Polytrichaceae	Polytrichum	commune
moss	Polytrichaceae	Polytrichum	strictum
moss	Sphagnaceae	Sphagnum	angustifolium
moss	Sphagnaceae	Sphagnum	girgensohnii
moss	Sphagnaceae	Sphagnum	lenense
moss	Sphagnaceae	Sphagnum	magellanicum
moss	Sphagnaceae	Sphagnum	rubellum
moss	Sphagnaceae	Sphagnum	squarrosum
moss	Sphagnaceae	Sphagnum	warnstorfii
